# Supplementary material for: Spatial Patterns in Rush-Hour vs. Work-Week Diesel-Related Pollution across a Downtown Core
Source: PubMed Central journal article supplement (PMC6164514; doi:10.3390/ijerph15091968), 2018-09-10
Supplement: ijerph-15-01968-s001.pdf [file ijerph-15-01968-s001.pdf]

## Supporting Information:

Table S1. Summary and comparison of rush-hour temporally-adjusted pollutant concentrations by winter and summer seasons.

| Pollutant                                           | Summer Season        |              | Winter Season         |              | p-value between programs |
|-----------------------------------------------------|----------------------|--------------|-----------------------|--------------|--------------------------|
|                                                     | Mean (SD)            | Median       | Mean (SD)             | Median       |                          |
| PM <sub>2.5</sub> (µg/m <sup>3</sup> )              | 13.12 (1.69)         | 12.61        | 13.45 (1.63)          | 13.41        | 0.29                     |
| BC (abs)                                            | 2.09 (0.76)          | 1.97         | 1.39 (0.58)           | 1.22         | <0.0001                  |
| Total EC (µg/m <sup>3</sup> )                       | 1.98 (0.89)          | 1.85         | 1.57 (0.74)           | 1.48         | 0.03                     |
| Total OC (µg/m <sup>3</sup> )                       | 2.87 (0.91)          | 2.64         | 2.29 (0.62)           | 2.03         | 0.003                    |
| <b>Diesel Tracers (ng/m<sup>3</sup>):</b>           |                      |              |                       |              |                          |
| Al                                                  | 35.24 (35.89)        | 23.83        | 28.25 (14.43)         | 23.84        | 0.41                     |
| Ba                                                  | 4.82 (2.93)          | 4.38         | 4.72 (2.16)           | 3.98         | 0.89                     |
| <b>Ca</b>                                           | <b>63.63 (58.10)</b> | <b>52.41</b> | <b>104.10 (77.85)</b> | <b>86.08</b> | <b>0.06</b>              |
| Cr                                                  | 1.30 (0.69)          | 1.29         | 1.26 (0.42)           | 1.22         | 0.81                     |
| Cu                                                  | 5.09 (2.88)          | 4.50         | 5.05 (2.04)           | 4.36         | 0.95                     |
| Fe                                                  | 106.17 (48.82)       | 107.79       | 115.81 (49.47)        | 104.85       | 0.54                     |
| Mg                                                  | 10.19 (6.59)         | 9.74         | 31.86 (69.20)         | 14.86        | 0.15                     |
| <b>P</b>                                            | <b>3.63 (1.52)</b>   | <b>3.59</b>  | <b>4.98 (1.31)</b>    | <b>4.92</b>  | <b>0.004</b>             |
| S                                                   | 571.15 (216.59)      | 615.94       | 587.35 (110.60)       | 593.93       | 0.75                     |
| <b>Zn</b>                                           | <b>11.07 (5.14)</b>  | <b>10.70</b> | <b>26.86 (9.87)</b>   | <b>27.06</b> | <b>&lt;0.0001</b>        |
| <b>Tracers of Other Sources (ng/m<sup>3</sup>):</b> |                      |              |                       |              |                          |
| <b>As</b>                                           | <b>0.60 (0.18)</b>   | <b>0.60</b>  | <b>0.13 (0.10)</b>    | <b>0.10</b>  | <b>&lt;0.0001</b>        |
| <b>K</b>                                            | <b>34.78 (18.87)</b> | <b>32.57</b> | <b>48.86 (12.19)</b>  | <b>49.55</b> | <b>0.002</b>             |
| Mn                                                  | 4.50 (2.50)          | 4.31         | 5.65 (2.30)           | 5.37         | 0.13                     |
| Mo                                                  | 1.92 (0.79)          | 1.88         | 21.67 (97.61)         | 1.77         | 0.33                     |
| Ni                                                  | 0.58 (0.36)          | 0.52         | 2.14 (4.21)           | 0.37         | 0.09                     |
| Pb                                                  | 2.39 (1.01)          | 2.40         | 2.54 (0.52)           | 2.54         | 0.55                     |
| Sb                                                  | 1.14 (0.60)          | 0.98         | 0.94 (0.30)           | 0.85         | 0.17                     |
| <b>Se</b>                                           | <b>1.21 (0.37)</b>   | <b>1.28</b>  | <b>0.41 (1.86)</b>    | <b>0.75</b>  | <b>0.06</b>              |
| Sr                                                  | 0.59 (0.31)          | 0.57         | 0.56 (0.24)           | 0.51         | 0.82                     |
| <b>V</b>                                            | <b>0.30 (0.05)</b>   | <b>0.30</b>  | <b>0.22 (0.04)</b>    | <b>0.23</b>  | <b>&lt;0.0001</b>        |
| <b>PAHs (ng/m<sup>3</sup>):</b>                     |                      |              |                       |              |                          |
| Benz[a]anthracene                                   | N/A                  | N/A          | 0.08 (0.04)           | 0.07         | N/A                      |
| Benzo[a]pyrene                                      | 0.07 (0.06)          | 0.05         | 0.03 (0.04)           | 0.01         | 0.13                     |
| <b>Benzo[e]pyrene</b>                               | <b>0.03 (0.02)</b>   | <b>0.03</b>  | <b>0.08 (0.03)</b>    | <b>0.08</b>  | <b>0.01</b>              |
| Benzo[ghi]fluoranthene                              | N/A                  | N/A          | 0.04 (0.02)           | 0.04         | N/A                      |
| <b>Benzo[ghi]perylene</b>                           | <b>0.01 (0.01)</b>   | <b>0.01</b>  | <b>0.03 (0.01)</b>    | <b>0.03</b>  | <b>0.04</b>              |
| Chrysene                                            | N/A                  | N/A          | 0.23 (0.07)           | 0.19         | N/A                      |

|                                     |                    |             |                    |             |                   |
|-------------------------------------|--------------------|-------------|--------------------|-------------|-------------------|
| Fluoranthene                        | 0.17 (0.15)        | 0.12        | 0.20 (0.07)        | 0.19        | 0.27              |
| Indeno[1,2,3-cd]pyrene              | 0.01 (0.01)        | 0.01        | 0.01 (0.002)       | 0.01        | N/A               |
| <b>Pyrene</b>                       | <b>0.08 (0.08)</b> | <b>0.04</b> | <b>0.16 (0.05)</b> | <b>0.15</b> | <b>0.001</b>      |
| <b>Total PAHs</b>                   | <b>0.22 (0.22)</b> | <b>0.16</b> | <b>0.71 (0.21)</b> | <b>0.66</b> | <b>&lt;0.0001</b> |
| <b>Hopanes (ng/m<sup>3</sup>):</b>  |                    |             |                    |             |                   |
| Total hopanes                       | 0.13 (0.10)        | 0.11        | 0.15 (0.11)        | 0.12        | 0.57              |
| <b>Steranes (ng/m<sup>3</sup>):</b> |                    |             |                    |             |                   |
| <b>Cholestane</b>                   | <b>N/A</b>         | <b>N/A</b>  | <b>N/A</b>         | <b>N/A</b>  | <b>&lt;0.0001</b> |

Table S2. Summary and comparison of work-week temporally-adjusted pollutant concentrations by winter and summer seasons.

| Pollutant                                                       | Summer Season          |               | Winter Season          |               | p-value between programs |
|-----------------------------------------------------------------|------------------------|---------------|------------------------|---------------|--------------------------|
|                                                                 | Mean (SD)              | Median        | Mean (SD)              | Median        |                          |
| PM <sub>2.5</sub> (µg/m <sup>3</sup> ) <sup>a</sup>             | 12.84 (1.98)           | 12.41         | 13.24 (1.67)           | 13.63         | 0.24                     |
| BC (abs) <sup>a</sup>                                           | 1.83 (0.64)            | 1.76          | 1.25 (0.47)            | 1.10          | <0.0001                  |
| Total EC (µg/m <sup>3</sup> )                                   | 1.85 (0.76)            | 1.57          | 1.43 (0.62)            | 1.28          | 0.001                    |
| Total OC (µg/m <sup>3</sup> )                                   | 2.65 (0.56)            | 2.51          | 2.45 (0.77)            | 2.37          | 0.10                     |
| <b>Diesel Tracers (ng/m<sup>3</sup>)<sup>b</sup>:</b>           |                        |               |                        |               |                          |
| <b>Al</b>                                                       | <b>52.23 (44.58)</b>   | <b>36.16</b>  | <b>27.83 (17.06)</b>   | <b>24.04</b>  | <b>0.02</b>              |
| Ba                                                              | 6.55 (6.94)            | 3.91          | 4.30 (2.91)            | 3.73          | 0.13                     |
| Ca                                                              | 83.72 (86.34)          | 51.20         | 86.28 (48.32)          | 92.02         | 0.89                     |
| Cr                                                              | 1.51 (1.25)            | 1.33          | 1.09 (0.43)            | 1.15          | 0.09                     |
| <b>Cu</b>                                                       | <b>5.59 (4.03)</b>     | <b>4.60</b>   | <b>4.30 (2.24)</b>     | <b>4.15</b>   | <b>0.06</b>              |
| Fe                                                              | 121.94 (85.25)         | 106.40        | 109.21 (72.89)         | 97.38         | 0.59                     |
| Mg                                                              | 17.69 (19.77)          | 8.23          | 16.89 (11.54)          | 16.19         | 0.80                     |
| P                                                               | 3.99 (2.25)            | 3.65          | 4.43 (1.47)            | 4.31          | 0.42                     |
| <b>S</b>                                                        | <b>781.12 (424.32)</b> | <b>771.86</b> | <b>568.44 (178.00)</b> | <b>602.76</b> | <b>0.04</b>              |
| <b>Zn</b>                                                       | <b>13.15 (8.38)</b>    | <b>11.67</b>  | <b>19.05 (9.17)</b>    | <b>17.78</b>  | <b>0.03</b>              |
| <b>Tracers of Other Sources (ng/m<sup>3</sup>)<sup>b</sup>:</b> |                        |               |                        |               |                          |
| <b>As</b>                                                       | <b>0.59 (0.21)</b>     | <b>0.62</b>   | <b>0.30 (0.28)</b>     | <b>0.24</b>   | <b>0.003</b>             |
| K                                                               | 38.46 (21.37)          | 37.40         | 42.66 (16.31)          | 41.50         | 0.40                     |
| Mn                                                              | 4.91 (2.96)            | 4.47          | 4.55(2.10)             | 4.44          | 0.44                     |
| Mo                                                              | 2.14 (1.32)            | 1.95          | 32.26 (106.88)         | 0.89          | 0.18                     |
| Ni                                                              | 0.67 (0.52)            | 0.58          | 0.69 (0.79)            | 0.40          | 0.73                     |
| Pb                                                              | 2.61 (1.64)            | 2.37          | 2.44 (0.90)            | 2.53          | 0.64                     |
| <b>Sb</b>                                                       | <b>1.24 (0.87)</b>     | <b>1.03</b>   | <b>0.82 (0.33)</b>     | <b>0.83</b>   | <b>0.03</b>              |
| Se                                                              | 1.24 (0.33)            | 1.32          | 1.62 (1.50)            | 1.28          | 0.18                     |
| Sr                                                              | 0.61 (0.41)            | 0.54          | 0.54 (0.28)            | 0.54          | 0.43                     |
| <b>V</b>                                                        | <b>0.30 (0.04)</b>     | <b>0.30</b>   | <b>0.23 (0.07)</b>     | <b>0.23</b>   | <b>0.0004</b>            |
| <b>PAHs (ng/m<sup>3</sup>):</b>                                 |                        |               |                        |               |                          |

|                                     |                    |             |                    |             |                   |
|-------------------------------------|--------------------|-------------|--------------------|-------------|-------------------|
| Benz[a]anthracene                   | N/A                | N/A         | 0.07 (0.03)        | 0.06        | N/A               |
| Benzo[a]pyrene                      | 0.04 (0.01)        | 0.04        | 0.04 (0.03)        | 0.03        | 0.14              |
| <b>Benzo[e]pyrene</b>               | <b>0.03 (0.01)</b> | <b>0.03</b> | <b>0.04 (0.01)</b> | <b>0.04</b> | <b>0.02</b>       |
| Benzo[ghi]fluoranthene              | N/A                | N/A         | 0.06 (0.02)        | 0.06        | N/A               |
| <b>Benzo[ghi]perylene</b>           | <b>0.01 (0.01)</b> | <b>0.01</b> | <b>0.04 (0.03)</b> | <b>0.03</b> | <b>0.05</b>       |
| <b>Chrysene</b>                     | <b>0.04 (0.02)</b> | <b>0.03</b> | <b>0.19 (0.08)</b> | <b>0.16</b> | <b>0.0002</b>     |
| <b>Fluoranthene</b>                 | <b>0.11 (0.09)</b> | <b>0.08</b> | <b>0.20 (0.08)</b> | <b>0.17</b> | <b>0.002</b>      |
| Indeno[1,2,3-cd]pyrene              | 0.01 (0.01)        | 0.01        | 0.01 (0.02)        | 0           | 0.92              |
| <b>Pyrene</b>                       | <b>0.05 (0.05)</b> | <b>0.03</b> | <b>0.17 (0.07)</b> | <b>0.15</b> | <b>0.0003</b>     |
| <b>Total PAHs</b>                   | <b>0.14 (0.15)</b> | <b>0.09</b> | <b>0.72 (0.18)</b> | <b>0.64</b> | <b>&lt;0.0001</b> |
| <b>Hopanes (ng/m<sup>3</sup>):</b>  |                    |             |                    |             |                   |
| Total hopanes                       | 0.18 (0.14)        | 0.13        | 0.19 (0.11)        | 0.16        | 0.77              |
| <b>Steranes (ng/m<sup>3</sup>):</b> |                    |             |                    |             |                   |
| <b>Cholestane</b>                   | <b>0.02 (0.02)</b> | <b>0.02</b> | <b>N/A</b>         | <b>N/A</b>  | <b>&lt;0.0001</b> |

<sup>a</sup>One measurement lost due to chrontrroller failure in summer.

<sup>b</sup>One sample lost due to chrontrroller error; one sample lost due to microwave bomb failure in summer.
